# Supplementary material for: Integrating faults and past earthquakes into a probabilistic seismic hazard model for peninsular Italy
Source: Copernicus journal article supplement (doi:10.5194/nhess-2017-41), 2017-02-06
Supplement: Supplementary file 1 [file nhess-2017-41-supplement.zip]

- [1] Aloisi, M., V. Bruno, F. Cannavo, L. Ferranti, M. Mattia, C. Monaco, and M. Palano. 2013. 'Are the source models of the M 7.1 1908 Messina Straits earthquake reliable? Insights from a novel inversion and a sensitivity analysis of levelling data', *Geophysical Journal International*, 192: 1025-41.
- [2] Barchi, M., F. Galadini, G. Lavecchia, P. Messina, A.M. Michetti, L. Peruzza, A. Pizzi, E. Tondi, and E. Vittori. 2000. Sintesi delle conoscenze sulle faglie attive in Italia centrale. CNR - Gruppo Nazionale per la Difesa dai Terremoti, Rome, Italy, 62 pp.
- [3] Basili, R., G. Valensise, P. Vannoli, P. Burrato, U. Fracassi, S. Mariano, M. M. Tiberti, and E. Boschi. 2008. 'The Database of Individual Seismogenic Sources (DISS), version 3: Summarizing 20 years of research on Italy's earthquake geology', *Tectonophysics*, 453: 20-43.
- [4] Benedetti, L., P. Tapponnier, G. C. P. King, and L. Piccardi. 1998. 'Surface Rupture of the 1857 Southern Italian earthquake?', *Terra Nova*, 10: 206-10.
- [5] Bianca, M., C. Monaco, L. Tortorici, and L. Cernobori. 1999. 'Quaternary normal faulting in southeastern Sicily (Italy): A seismic source for the 1693 large earthquake', *Geophysical Journal International*, 139: 370-94.
- [6] Boncio, P., F. Brozzetti, and G. Lavecchia. 2000. 'Architecture and seismotectonics of a regional low-angle normal fault zone in central Italy', *Tectonics*, 19: 1038-55.
- [7] Boncio, P., A. M. Dichiarante, E. Auciello, M. Saroli, and F. Stoppa. 2016. 'Normal faulting along the western side of the Matese Mountains: Implications for active tectonics in the Central Apennines (Italy)', *Journal of Structural Geology*, 82: 16-36.
- [8] Boncio, P., G. Lavecchia, and B. Pace. 2004. 'Defining a model of 3D seismogenic sources for Seismic Hazard Assessment applications: The case of central Apennines (Italy)', *Journal of Seismology*, 8: 407-25.
- [9] Boncio, P., T. Mancini, G. Lavecchia, and G. Selvaggi. 2007. 'Seismotectonics of strike-slip earthquakes within the deep crust of southern Italy: Geometry, kinematics, stress field and crustal rheology of the Potenza 1990-1991 seismic sequences (M-max 5.7)', *Tectonophysics*, 445: 281-300.
- [10] Brozzetti, F., P. Boncio, D.P. Tinari, D. Di Naccio and L. Torelli. 2007. A multidisciplinary approach to the seismotectonics of the Lunigiana and Garfagnana extensional basins (Northern Tuscany, Italy). *Rendiconti della Società Geologica Italiana*, 4: 164-165.
- [11] Brozzetti, F. 2011. 'The Campania-Lucania Extensional Fault System, southern Italy: A suggestion for a uniform model of active extension in the Italian Apennines', *Tectonics*, 30.
- [12] Brozzetti, F., P. Boncio, G. Lavecchia, and B. Pace. 2009. 'Present activity and seismogenic potential of a low-angle normal fault system (Citta di Castello, Italy): Constraints from surface geology, seismic reflection data and seismicity', *Tectonophysics*, 463: 31-46.
- [13] Burrato, P., M. E. Poli, P. Vannoli, A. Zanferrari, R. Basili, and F. Galadini. 2008. 'Sources of M-w 5+ earthquakes in northeastern Italy and western Slovenia: An updated view based on geological and seismological evidence', *Tectonophysics*, 453: 157-76.
- [14] Burrato, P., and G. Valensise. 2008. 'Rise and fall of a hypothesized seismic gap: Source complexity in the M-w 7.0 16 December 1857 southern Italy earthquake', *Bulletin of the Seismological Society of America*, 98: 139-48.
- [15] Calabro, R. A., S. Corrado, D. Di Bucci, P. Robustini, and M. Tornaghi. 2003. 'Thin-skinned vs. thick-skinned tectonics in the Matese Massif, Central-Southern Apennines (Italy)', *Tectonophysics*, 377: 269-97.
- [16] Calamita, F., M. Coltorti, D. Piccinini, P. P. Pierantoni, A. Pizzi, M. Ripepe, V. Scisciani, and E. Turco. 2000. 'Quaternary faults and seismicity in the Umbro-Marchean Apennines (Central Italy): evidence from the 1997 Colfiorito earthquake', *Journal of Geodynamics*, 29: 245-64.

- [17] Catalano, S., G. De Guidi, C. Monaco, G. Tortorici, and L. Tortorici. 2008. 'Active faulting and seismicity along the Siculo-Calabrian Rift Zone (Southern Italy)', *Tectonophysics*, 453: 177-92.
- [18] Cello, G., S. Mazzoli, E. Tondi, and E. Turco. 1997. 'Active tectonics in the central Apennines and possible implications for seismic hazard analysis in peninsular Italy', *Tectonophysics*, 272: 43-68.
- [19] Cinti, F. R., L. Cucci, D. Pantosti, G. D'Addezio, and M. Meghraoui. 1997. 'A major seismogenic fault in a 'silent area': the Castrovillari fault (southern Apennines, Italy)', *Geophysical Journal International*, 130: 595-605.
- [20] Cinti, F. R., M. Moro, D. Pantosti, L. Cucci, and G. D'Addezio. 2002. 'New constraints on the seismic history of the Castrovillari fault in the Pollino gap (Calabria, southern Italy)', *Journal of Seismology*, 6: 199-217.
- [21] Cinti, F. R., D. Pantosti, P. M. De Martini, S. Pucci, R. Civico, S. Pierdominici, L. Cucci, C. A. Brunori, S. Pinzi, and A. Patera. 2011. 'Evidence for surface faulting events along the Paganica fault prior to the 6 April 2009 L'Aquila earthquake (central Italy)', *Journal of Geophysical Research-Solid Earth*, 116.
- [22] Cinti, F. R., C. Pauselli, F. Livio, M. Ercoli, C. A. Brunori, M. F. Ferrario, R. Volpe, R. Civico, D. Pantosti, S. Pinzi, P. M. De Martini, G. Ventura, L. Alfonsi, R. Gambillara, and A. M. Michetti. 2015. 'Integrating multidisciplinary, multiscale geological and geophysical data to image the Castrovillari fault (Northern Calabria, Italy)', *Geophysical Journal International*, 203: 1847-63.
- [23] Cinque, A., A. Ascione, and Caiazzo. 2000. Distribuzione spazio-temporale e caratterizzazione della fagliazione quaternaria in Appennino meridionale. 2000. in: Galadini F., Meletti C., and Rebez A. (Eds), *Le ricerche del GNDT nel campo della pericolosità sismica (1996-1999)*, CNR-Gruppo Nazionale per la Difesa dai Terremoti - Roma, 203-218.
- [24] D'Addezio, G., E. Masana, and D. Pantosti. 2001. 'The Holocene paleoseismicity of the Aremogna-Cinque Miglia fault (Central Italy)', *Journal of Seismology*, 5: 181-205.
- [25] Delle Donne, D., L. Piccardi, F. Sani and G. Vannucci. 2003. Active Tectonics of the Mugello Basin (Northern Apennines, Italy). *Geophysical Research Abstracts*. 5: 06229.
- [26] Di Bucci, D., S. Corrado, and G. Naso. 2002. 'Active faults at the boundary between Central and Southern Apennines (Isernia, Italy)', *Tectonophysics*, 359: 47-63.
- [27] Di Bucci, D., B. Massa, M. Tornaghi, and A. Zuppetta. 2005. 'Structural setting of the 1688 Sannio earthquake epicentral area (Southern Italy) from surface and subsurface data', *Journal of Geodynamics*, 40: 294-315.
- [28] Di Naccio, D., P. Boncio, F. Brozzetti, F. J. Pazzaglia, and G. Lavecchia. 2013. 'Morphotectonic analysis of the Lunigiana and Garfagnana grabens (northern Apennines, Italy): Implications for active normal faulting', *Geomorphology*, 201: 293-311.
- [29] DISS Working Group. 2015. Database of Individual Seismogenic Sources (DISS), Version 3.2.0: A compilation of potential sources for earthquakes larger than M 5.5 in Italy and surrounding areas. <http://diss.rm.ingv.it/diss/>, Istituto Nazionale di Geofisica e Vulcanologia; DOI:10.6092/INGV.IT-DISS3.2.0
- [30] Eva, E., S. Solarino, and P. Boncio. 2014. 'HypoDD relocated seismicity in northern Apennines (Italy) preceding the 2013 seismic unrest: seismotectonic implications for the Lunigiana-Garfagnana area', *Bollettino Di Geofisica Teorica Ed Applicata*, 55: 739-54.
- [31] Falcucci, E., S. Gori, M. Moro, A. R. Pisani, D. Melini, F. Galadini, and P. Fredi. 2011. 'The 2009 L'Aquila earthquake (Italy): What's next in the region? Hints from stress diffusion analysis and normal fault activity', *Earth and Planetary Science Letters*, 305: 350-58.
- [32] Faure-Walker J. 2014. Mechanics of continental extension from Quaternary strain fields in the Italian Apennines. PhD Thesis, pp 405.
- [33] Ferranti, L., G. Milano, P. Burrato, M. Palano, and F. Cannavo. 2015. 'The seismogenic structure of the 2013-2014 Matese seismic sequence, Southern Italy: implication for the

geometry of the Apennines active extensional belt', *Geophysical Journal International*, 201: 823-37.

- [34] Ferranti, L., M. Palano, F. Cannavo, M. E. Mazzella, J. S. Oldow, E. Gueguen, M. Mattia, and C. Monaco. 2014. 'Rates of geodetic deformation across active faults in southern Italy', *Tectonophysics*, 621: 101-22.
- [35] Fracassi, U., and G. Valensise. 2007. 'Unveiling the sources of the catastrophic 1456 multiple earthquake: Hints to an unexplored tectonic mechanism in southern Italy', *Bulletin of the Seismological Society of America*, 97: 725-48.
- [36] Galadini, F. and P. Galli. 2000. Active Tectonics in the Central Apennines (Italy) - Input Data for Seismic Hazard Assessment. *Natural Hazards*, 22: 225-270.
- [37] Galadini, F., C. Meletti, E. Vittori. 2000. Stato delle conoscenze sulle faglie attive in Italia: elementi geologici di superficie. In: Galadini F., Meletti C., Rebez A. (Eds.), *Le ricerche del GNDT nel campo della pericolosità sismica (1996-1999)*, 107-136.
- [38] Galadini, F., and P. Galli. 2003. 'Paleoseismology of silent faults in the central Apennines (Italy): the Mt. Vettore and Laga Mts. Faults', *Annals of Geophysics*, 46: 815-36.
- [39] Galadini, F., P. Galli, and M. Moro. 2003. 'Paleoseismology of silent faults in the central Apennines (Italy): the Campo Imperatore Fault (Gran Sasso Range Fault System)', *Annals of Geophysics*, 46: 793-813.
- [40] Galadini, F., M. E. Poli, and A. Zanferrari. 2005. 'Seismogenic sources potentially responsible for earthquakes with  $M \geq 6$  in the eastern Southern Alps (Thiene-Udine sector, NE Italy)', *Geophysical Journal International*, 161: 739-62.
- [41] Galli P., V. Spina, I. Ilardo and G. Naso. 2010. Evidence of Active Tectonics in Southern Italy: The Rossano Fault (Calabria). In: *Recent Progress on Earthquake Geology*. ISBN: 978-1-60876-147-0, pp. 49-78.
- [42] Galli, P. A. C., B. Giaccio, P. Messina, E. Peronace, and G. M. Zuppi. 2011. 'Palaeoseismology of the L'Aquila faults (central Italy, 2009, M-w 6.3 earthquake): implications for active fault linkage', *Geophysical Journal International*, 187: 1119-34.
- [43] Galli, P. A. C., and J. A. Naso. 2009. 'Unmasking the 1349 earthquake source (southern Italy): paleoseismological and archaeoseismological indications from the Aquae Iuliae fault', *Journal of Structural Geology*, 31: 128-49.
- [44] Galli, P. A. C., and E. Peronace. 2015. 'Low slip rates and multimillennial return times for M-w 7 earthquake faults in southern Calabria (Italy)', *Geophysical Research Letters*, 42: 5258-65.
- [45] Galli, P. A. C., E. Peronace, B. Quadrio, and G. Esposito. 2014. 'Earthquake fingerprints along fault scarps: A case study of the Irpinia 1980 earthquake fault (southern Apennines)', *Geomorphology*, 206: 97-106.
- [46] Galli, P., and V. Bosi. 2002. 'Paleoseismology along the Cittanova fault: Implications for seismotectonics and earthquake recurrence in Calabria (southern Italy)', *Journal of Geophysical Research-Solid Earth*, 107.
- [47] Galli, P., and V. Bosi. 2003. 'Catastrophic 1638 earthquakes in Calabria (southern Italy): New insights from paleoseismological investigation', *Journal of Geophysical Research-Solid Earth*, 108.
- [48] Galli, P., V. Bosi, S. Piscitelli, A. Giocoli, and V. Scionti. 2006. 'Late Holocene earthquakes in southern Apennine: paleoseismology of the Caggiano fault', *International Journal of Earth Sciences*, 95: 855-70.
- [49] Galli, P., and F. Galadini. 2003. 'Disruptive earthquakes revealed by faulted archaeological relics in Samnium (Molise, southern Italy)', *Geophysical Research Letters*, 30.
- [50] Galli, P., F. Galadini, and F. Calzoni. 2005. 'Surface faulting in Norcia (central Italy): a "paleoseismological perspective"', *Tectonophysics*, 403: 117-30.
- [51] Galli, P., F. Galadini, and D. Pantosti. 2008. 'Twenty years of paleoseismology in Italy', *Earth-Science Reviews*, 88: 89-117.

- [52] Galli, P., A. Ruga, V. Scionti, and R. Spadea. 2006. 'Archaeoseismic evidence for a Late Roman earthquake in the Crotona area (Ionian Calabria, Southern Italy): Seismotectonic implications', *Journal of Seismology*, 10: 443-58.
- [53] Galli, P., and V. Scionti. 2006. 'Two unknown  $M > 6$  historical earthquakes revealed by palaeoseismological and archival researches in eastern Calabria (southern Italy). Seismotectonic implications', *Terra Nova*, 18: 44-49.
- [54] Galli, P., V. Scionti, and V. Spina. 2007. 'New paleoseismic data from the Lakes and Serre faults: seismotectonic implications for Calabria (Southern Italy)', *Bollettino Della Societa Geologica Italiana*, 126: 347-64.
- [55] Giocoli, A., P. Burrato, P. Galli, V. Lapenna, S. Piscitelli, E. Rizzo, G. Romano, A. Siniscalchi, C. Magri, and P. Vannoli. 2008. Using ERT method in tectonically active areas: hints from Southern Apennine (Italy). *Advances in Geosciences*, 19: 61-65.
- [56] Giraudi, C. 1989. 'Lake Levels and Climate for the Last 30,000 Years in the Fucino Area (Abruzzo-Central Italy) - a Review', *Palaeogeography Palaeoclimatology Palaeoecology*, 70: 249-60.
- [57] Giraudi, C., and M. Frezzotti. 1995. 'Paleoseismicity in the Gran-Sasso Massif (Abruzzo, Central Italy)', *Quaternary International*, 25: 81-93.
- [58] Kastelic, V., P. Vannoli, P. Burrato, U. Fracassi, M. M. Tiberti, and G. Valensise. 2013. 'Seismogenic sources in the Adriatic Domain', *Marine and Petroleum Geology*, 42: 191-213.
- [59] Lavecchia, G., P. Boncio, F. Brozzetti, R. De Nardis, B. Pace and F. Visini. 2006. Studio della Pericolosità sismica della Regione Abruzzo. Lavoro realizzato nell'ambito della Convenzione fra Regione Abruzzo e Università "G. D'Annunzio" di Chieti dal titolo "Studio della Pericolosità sismica della Regione Abruzzo e ulteriori attività di supporto tecnico-scientifico da realizzare nell'ambito del Coordinamento delle Università abruzzesi per la ricerca applicata alla mitigazione del Rischio sismico". Rapporto interno, GeoSisLab – Dipartimento di Scienze della Terra, Università di Chieti. 31 pp, 5 tav. f.t.
- [60] Lavecchia, G., P. Boncio, F. Brozzetti, R. de Nardis, and F. Visini. 2009. The contribution of structural geology and regional tectonics to the definition of large-scale seismotectonic provinces and individual seismogenic sources: Application to the extensional belt of central Italy, in *Recent Progress on Earthquake Geology*, edited by P. Guarnieri, pp. 165–188, Nova Sci., New York.
- [61] Loreto, M. F., U. Fracassi, A. Franzo, P. Del Negro, F. Zgur, and L. Facchin. 2013. 'Approaching the seismogenic source of the Calabria 8 September 1905 earthquake: New geophysical, geological and biochemical data from the S. Eufemia Gulf (S Italy)', *Marine Geology*, 343: 62-75.
- [62] Maesano, F. E., G. Toscani, P. Burrato, F. Mirabella, C. D'Ambrogi, and R. Basili. 2013. 'Deriving thrust fault slip rates from geological modeling: Examples from the Marche coastal and offshore contraction belt, Northern Apennines, Italy', *Marine and Petroleum Geology*, 42: 122-34.
- [63] Maschio, L., L. Ferranti, and P. Burrato. 2005. 'Active extension in Val d'Agri area, Southern Apennines, Italy: implications for the geometry of the seismogenic belt', *Geophysical Journal International*, 162: 591-609.
- [64] Michetti, A.M., F. Brunamonte, L. Serva and R.A. Whitney. 1995. Seismic hazard assessment from paleoseismological evidence in the Rieti region, central Italy, In: L. Serva and D.B. Slemmons (eds), *Perspectives in Paleoseismology*, Bulletin of the Association of Engineering Geologists, Special Publication No 6: "Perspectives in Paleoseismology", 63-82.
- [65] Michetti, A.M., L. Ferrelì, E. Esposito, S. Porfido, A.M. Blumetti, E. Vittori, L. Serva and G.P. Roberts. 2000. Ground Effects during the 9 September 1998,  $M_w = 5.6$ , Lauria Earthquake and the seismic potential of the aseismic Pollino Region in Southern Italy. *Seismological Research Letters*, 71: 31-46.

- [66] Monaco, C., P. Tapponnier, L. Tortorici, and P. Y. Gillot. 1997. 'Late Quaternary slip rates on the Acireale-Piedimonte normal faults and tectonic origin of Mt. Etna (Sicily)', *Earth and Planetary Science Letters*, 147: 125-39.
- [67] Monaco, C., and L. Tortorici. 2000. 'Active faulting in the Calabrian arc and eastern Sicily', *Journal of Geodynamics*, 29: 407-24.
- [68] Monaco, C., and L. Tortorici. 2007. 'Active faulting and related tsunamis in eastern Sicily and south-western Calabria', *Bollettino Di Geofisica Teorica Ed Applicata*, 48: 163-84.
- [69] Moretti A. 2000. Il database delle faglie capaci della Calabria: stato attuale delle conoscenze.
- [70] Morewood, N. C., and G. P. Roberts. 2000. 'The geometry, kinematics and rates of deformation within an en echelon normal fault segment boundary, central Italy', *Journal of Structural Geology*, 22: 1027-47.
- [71] Moro, M., L. Amicucci, F. R. Cinti, F. Doumaz, P. Montone, S. Pierdominici, M. Saroli, S. Stramondo, and B. Di Fiore. 2007. 'Surface evidence of active tectonics along the Pergola-Melandro fault: A critical issue for the seismogenic potential of the southern Apennines, Italy', *Journal of Geodynamics*, 44: 19-32.
- [72] Moro, M., S. Gori, E. Falcucci, M. Saroli, F. Galadini, and S. Salvi. 2013. 'Historical earthquakes and variable kinematic behaviour of the 2009 L'Aquila seismic event (central Italy) causative fault, revealed by paleoseismological investigations', *Tectonophysics*, 583: 131-44.
- [73] Pace, B., G. M. Bocchini, and P. Boncio. 2014. 'Do static stress changes of a moderate-magnitude earthquake significantly modify the regional seismic hazard? Hints from the L'Aquila 2009 normal-faulting earthquake (Mw 6.3, central Italy)', *Terra Nova*, 26: 430-39.
- [74] Pace, B., L. Peruzza, G. Lavecchia, and P. Boncio. 2006. 'Layered seismogenic source model and probabilistic seismic-hazard analyses in central Italy', *Bulletin of the Seismological Society of America*, 96: 107-32.
- [75] Pantosti, D., G. D'Addezio, and F. R. Cinti. 1996. 'Paleoseismicity of the Ovindoli-Pezza fault, central Apennines, Italy: A history including a large, previously unrecorded earthquake in the Middle Ages (860-1300 AD)', *Journal of Geophysical Research-Solid Earth*, 101: 5937-59.
- [76] Pantosti, D., D. P. Schwartz, and G. Valensise. 1993. 'Paleoseismology Along the 1980 Surface Rupture of the Irpinia Fault - Implications for Earthquake Recurrence in the Southern Apennines, Italy', *Journal of Geophysical Research-Solid Earth*, 98: 6561-&.
- [77] Papanikolaou, I. D., and G. P. Roberts. 2007. 'Geometry, kinematics and deformation rates along the active normal fault system in the southern Apennines: Implications for fault growth', *Journal of Structural Geology*, 29: 166-88.
- [78] Papanikolaou, I. D., G. P. Roberts, and A. M. Michetti. 2005. 'Fault scarps and deformation rates in Lazio-Abruzzo, Central Italy: Comparison between geological fault slip-rate and GPS data', *Tectonophysics*, 408: 147-76.
- [79] Patacca, E., and P. Scandone. 2004. 'The 1627 Gargano earthquake (Southern Italy): Identification and characterization of the causative fault', *Journal of Seismology*, 8: 259-73.
- [80] Peruzza, L., B. Pace, and F. Visini. 2011. 'Fault-Based Earthquake Rupture Forecast in Central Italy: Remarks after the L'Aquila M-w 6.3 Event', *Bulletin of the Seismological Society of America*, 101: 404-12.
- [81] Pizzi, A., F. Calamita, M. Coltorti and P. Pieruccini. 2002. Quaternary normal faults, intramontane basins and seismicity in the Umbria-Marche Abruzzi Apennine ridge (Italy): contribution of neotectonic analysis to seismic hazard assessment. *Bollettino della società geologica italiana*, 1: 923-929.
- [82] Porfido, S., E. Esposito, E. Vittori, G. Tranfaglia, A. M. Michetti, M. Blumetti, L. Ferreli, L. Guerrieri, and L. Serva. 2002. 'Areal distribution of ground effects induced by strong earthquakes in the Southern Apennines (Italy)', *Surveys in Geophysics*, 23: 529-62.

- [83] Presti, D., A. Billi, B. Orecchio, C. Totaro, C. Faccenna, and G. Neri. 2013. 'Earthquake focal mechanisms, seismogenic stress, and seismotectonics of the Calabrian Arc, Italy', *Tectonophysics*, 602: 153-75.
- [84] Roberts, G. P., and A. M. Michetti. 2004. 'Spatial and temporal variations in growth rates along active normal fault systems: an example from The Lazio-Abruzzo Apennines, central Italy', *Journal of Structural Geology*, 26: 339-76.
- [85] Roberts, G. P., B. Raithatha, G. Sileo, A. Pizzi, S. Pucci, J. F. Walker, M. Wilkinson, K. McCaffrey, R. J. Phillips, A. M. Michetti, L. Guerrieri, A. M. Blumetti, E. Vittori, P. Cowie, P. Sammonds, P. Galli, P. Boncio, C. Bristow, and R. Walters. 2010. 'Shallow subsurface structure of the 2009 April 6 M-w 6.3 L'Aquila earthquake surface rupture at Paganica, investigated with ground-penetrating radar', *Geophysical Journal International*, 183: 774-90.
- [86] Sani, F., M. Bonini, L. Piccardi, G. Vannucci, D. Donne, M. Benvenuti, G. Moratti, G. Corti, D. Montanari, L. Sedda, and C. Tanini. 2009. 'Late Pliocene-Quaternary evolution of outermost hinterland basins of the Northern Apennines (Italy), and their relevance to active tectonics', *Tectonophysics*, 476: 336-56.
- [87] Schlagenhauf, A., I. Manighetti, L. Benedetti, Y. Gaudemer, R. Finkel, J. Malavieille, and K. Pou. 2011. 'Earthquake supercycles in Central Italy, inferred from Cl-36 exposure dating', *Earth and Planetary Science Letters*, 307: 487-500.
- [88] Serva, L., E. Esposito, L. Guerrieri, S. Porfido, E. Vittori, and V. Comerci. 2007. 'Environmental effects from five historical earthquakes in southern Apennines (Italy) and macroseismic intensity assessment: Contribution to INQUA EEE scale project', *Quaternary International*, 173: 30-44.
- [89] Tondi, E., L. Piccardi, S. Cacon, B. Kontny, and G. Cello. 2005. 'Structural and time constraints for dextral shear along the seismogenic Mattinata Fault (Gargano, southern Italy)', *Journal of Geodynamics*, 40: 134-52.
- [90] Tortorici, L., C. Monaco, C. Tansi, and O. Cocina. 1995. 'Recent and Active Tectonics in the Calabrian Arc (Southern Italy)', *Tectonophysics*, 243: 37-55.
- [91] Valensise, G., and D. Pantosti. 2001. 'The investigation of potential earthquake sources in peninsular Italy: A review', *Journal of Seismology*, 5: 287-306.
- [92] Valensise, G., D. Pantosti, and R. Basili. 2004. 'Seismology and Tectonic Setting of the 2002 Molise, Italy, Earthquake', *Earthquake Spectra*, 20: S23-S37.
- [93] Westaway, R., R. Gawthorpe, and M. Tozzi. 1989. 'Seismological and Field Observations of the 1984 Lazio-Abruzzo Earthquakes - Implications for the Active Tectonics of Italy', *Geophysical Journal International*, 98: 489-514.
