# Supplementary material for: Integrating faults and past earthquakes into a probabilistic seismic hazard model for peninsular Italy
Source: Copernicus journal article supplement (doi:10.5194/nhess-2017-41), 2017-02-06
Supplement: Supplementary file 1 [file supplement.xlsx]

## Sheet: Active Faults
ID	Name	Length (km)	Dip (°)	Dipping	Kinematic	Upper (km)	Lower (km)	Vertical Rate (mm/yr)	Slip Rate (mm/yr)	Historical EQ (>5.5)	Instrumental EQ	Paleoseismological EQ	Other References
1	Mulazzo	27	30-60	NE	N dip-slip	0	7	0.4 - 0.5 [28]		14/02/1834 (M= 5.96) [29]			[60][6][30]
2	Groppadalosio	25	50-70	SW	N dip-slip	0	7	0.6 - 0.8 [28]					[60][6][30]
3	Olivola	15	30-60	NE	N dip-slip	0	7	0.2 - 0.25 [28]		07/05/1481 (M= 5.6) [29]			[60][6][30]
4	Compione Comano	24	50-70	SW	N dip-slip	0	7	0.6 - 0.7 [28]					[60][6][30]
5	North Apuane Transfer	25.5	90	-	Strike slip dx	-	-			11/04/1837 (M= 5.94) [10]	10/10/1995 (Mw= 4.85)		[28][60][6][30]
6	Casciana-Bolognana	28 (16+12)	30-60	NE	N dip-slip	0	7	0.4 - 0.5 [28] 0.3 [28]		07/09/1920 (M= 6.53) [29]			[60][6][30]
7	Corfino	9.5	50-70	SW	N dip-slip	0	7	0.4 - 0.5 [28]					[60][6][30]
8	Barga	14	50-70	SW	N dip-slip	0	7	0.6 [28]					[60][6][30]
9	Garfagnana Mugello Transfer	47	90	-	Strike slip dx	-	-						[60][6][30]
10	Mugello	21	35-40	NE	N dip-slip	0	6-8		0.7 [25]	13/06/1542 (M= 6.02) [29] 29/06/1919 (M= 6.38) [29]			[60][6]
11	Ronta FS	19	60-70	SW	N dip-slip	0	7	0.16 [86] 0.36 [86]	0.5 [25]				[60][6]
12	Poppi	17	30-40	NE	N dip-slip	0	4.5	-	-				[60][6]
13	Citta' di Castello	22	40	NE	N dip-slip	0	3	0.6 - 0.8 [12]	0.25 - 0.75 [80]	18/10/1389 (M= 6.03) [12] 26/04/1458 (M= 5.8) [12] 30/09/1789 (M= 5.89) [12]
14	M.S. Maria Tiberina	11	40	NE	N dip-slip	0	2.5		0.25 - 0.75 [80]	25/12/1352 (M= 6.31) [12] 26/04/1917 (M= 5.99) [12]
15	Gubbio	24	50-55	SW	N dip-slip	0	6		0.8 [2] 0.4 - 1.2 [80]		29/04/1984 (M= 5,62) [74]		[6][8]
16	Gualdo Tadino	19.5	50-55	W	N dip-slip	0	8		0.25 - 0.75 [80]	17/04/1747 (M= 6.05) [74] 27/07/1751 (M= 6.38) [74]	03/04/1998 (M= 5.13)		[6][8]
17	Colfiorito	19	45-60	SW	N dip-slip	0	8-9	0.3 - 0.4 [37]	0.25 - 0.75 [80]	30/04/1279 (M= 6.2) [51]	26/09/1997 (M= 6.0) 26/09/1997 (M= 5.7)		[6][8]
18	San Martino - Civitella	14	55-60	SW	N dip-slip	0	6-7		0.3 - 0.9 [80]	11/10/1791 (M= 5.6)	10/12/1997 (M= 5.22) 14/12/1997 (M= 5.6)		[6][8]
19	Valle Umbra North	29	55	SW	N dip-slip	0	4.5		0.4 - 1.2 [80]	13/01/1832 (M= 6.43) [74] 12/02/1854 (M= 5.57) [74]			[8]
20	Valle Umbra South	24	55	SW	N dip-slip	0	4.5		0.4 - 1.2 [80]				[8]
21	Vettore-Bove	35	55-60	SW	N dip-slip	0	15	0.5 - 0.6 [2] 0.6 - 0.8 [81] 0.36 - 0.62 [38] 0.11 - 0.36 [38]	0.35 - 1.05 [80] 0.5 [74]			18 - 12 kyr [38] 5940-3965 BP [38] 4155 BP - 7° century [38]	[8]
22	Nottoria - Preci	29	50-75	SW	N dip-slip	0	12	0.5 - 0.7 [37] 0.33 [84] 0.2 [37] 0.6 - 0.7 [2] 0.7 - 0.9 [59]	0.3 - 0.5 [80] 0.6 [74]	01/12/1328 (M= 6.49) [74] 18/01/1703 (M= 6.92) [50] 27/06/1719 (M= 5.59) [74] 12/05/1730 (M= 6.04) [74] 3/9/1815 (M= 5.58) 22/08/1859 (M= 5.73) [74] 23/2/1879 (M= 5.59)	19/09/1979 (M= 5.82)	99 BC (-500,-50) [51]	[6][8]
23	Cascia - Cittareale	24	55-75	WSW	N dip-slip	0	12-15		0.3 - 0.9 [80] 0.9 - 1.0 [59] 0.4 - 0.5 [18] 0.6 - 0.7 [2] 0.2 - 0.3 [16]	06/11/1599 (M= 6.07) [74] 16/11/1916 (M= 5.5) [74]			[8]
24	Leonessa	15	55	NE	N dip-slip	0	8-12	0.3 [37] 0.1 - 0.4 [32] 0.4 ± 0.2 [18][78] 0.3 - 0.4 [84]	0.3 [2]				[8]
25	Rieti	19	55	SW	N dip-slip	0	10	0.2 - 0.5 [84]	0.3 - 0.5 [80] 0.2 - 0.4 [64]	1/12/1298 (M=6.2) [74] 27/6/1989 (M= 5.5) [74]			[8]
26	Sella di Corno	23	60	SW	N dip-slip	0	13	0.5 ± 0.2 [78] 0.43 ± 0.09 [32] 0.33 [84]
27	Pizzoli-Pettino	20 (13+7)	55	SW	N dip-slip	0	14	0.55 [84] 0.25 - 0.43 [37] 0.7 ± 0.3 [32] 0.47 - 0.86 [2]	0.4 - 0.6 [80] 0.4 - 0.8 [2]	02/02/1703 (M= 6.67) [74]			[8][73]
28	Monte Reale	14	55	SW	N dip-slip	0	14	0.20 ± 0.04 [32]	0.3 - 0.9 [80]				[8][73]
29	Gorzano Mt.	28	50-70	SW	N dip-slip	0	15	0.73 - 0.9 [37] 0.3 - 0.36 [37] 0.8 ± 0.16 [32]	0.2 - 0.6 [80] 0.2 - 0.4 [2]	07/10/1639 (M= 6.21) [74] 24/8/1646 (M=5.9)	09/04/2009 (M= 5.4)	after 8320-8150 BP [51] after 8320-8150 BP [51]	[8][73]
30	Campo Imperatore	28	55	SSW	N dip-slip	0	15	0.7 - 1.0 [57] 1.0 [16] 0.68 [39]	0.35 - 1.05 [80]			Pleistocene sup.(16-13 kyr) [51] 7155/7120 - 7035/6790 BP [51] after 3490-1000 AD [51]	[8][73]
31	Assergi	14	55	SSW	N dip-slip	0	15	0.7 -1.0 [2][81] 0.9 ± 0.3 [78] 0.84 ±0.17 [32]	0.6 - 0.8 [16]
32	Mt. Cappucciata	12	55	SW	N dip-slip	0	15	0.2 - 0.5 [32]
33	Paganica - San Demetrio	20	55	SW	N dip-slip	0	14	< 0.23-0.3 [85]	0.6 - 0.8 [80] 0.58 ± 0.13 [42] 0.7 ± 0.2 [72] 0.3 - 0.4 [21]	26/11/1461 (M= 6.5) [74] 6/10/1762 (M= 5.54)	06/04/2009 (M= 6.3)	2900-760 BC [21] 760 BC-670 AD [21] 890-1150 AD [21]	[8][73]
34	Campo Felice - Ovindoli	28	55	SW	N dip-slip	0	13	0.6 ± 0.3 [32] 0.8 -1.3 [36] 0.2 ± 0.1 [32] 0.5 - 1.0 [90]	1.0 [59] 0.8 - 1.2 [59] 0.6 - 1.3 [2] 0.9 - 1.1 [80]	3/12/1315 (M= 5.56)		7560-4980 BP [75][51] 3850-3375 BC [75][51] 1330 - 890 AD [75][51]	[8][73]
35	Valle del Salto	30	45-70	SW	N dip-slip	0	11	0.22 - 0.56 [70] 0.22 [84] 0.84 [84] 1.0 [78] 1.29 ± 0.26 [32]	0.5 - 0.7 [80]				[8][73]
36	Velino - Magnola	22	55	SW	N dip-slip	0	12.5	0.6 ± 0.2 [32] 0.7 - 0.8 [36]	0.7 - 0.9 [80] 0.8 [60]	24/02/1904 (M= 5.68) [74]		1400-1000 BP [87] 4200-3700 BP [87] 4500-4100 BP [87] 4800-4400 BP [87] 7800-7400 BP [87]	[8][73]
37	Carsoli	20.5	60	SW	N dip-slip	0	8-12	0.5 ± 0.2 [78] 0.22 - 0.38 [84]
38	Liri	43	60	SW	N dip-slip	0	8-12	0.9 - 2.0 [32] 0.82 ± 0.15 [78] 0.33 [84] 0.55 [84] 0.1 - 0.38 [84] 1.1 [84]
39	Fucino system	21	55	SW	N dip-slip	0	13	0.37 - 0.43 [36] 0.7 - 1.2 [75] 0.6 ± 0.2 [32] 0.7 ± 0.3 [32] 0.4 ± 0.2 [32]	0.7 - 0.8 [2] 0.9 - 1.1 [80]	13/01/1915 (M= 7.08)		508 AD - 618 AD [74] 3500-3300 BP [74] 5618 - 5944 BP [74] 4000 BC - 5979 BC [74] 5979 BC - 10729 BC [74] 10053 BC - 10729 BC [74]	[8][73]
40	Media Valle Aterno	23	50-70	SW	N dip-slip	0	14		0.3 - 0.4 [2] 0.15 - 0.45 [80]			II-I BC [31] 6381-3511 BP [31]	[8][73]
41	Sulmona	20	55	SW	N dip-slip	0	15	1.1 ± 0.4 [78] 1.00 [84]	0.6 - 0.8 [80]				[8][73]
42	Maiella	22	55	WSW	N dip-slip	0	8-12	0.6 - 1.3 [85] 0.83 ± 0.17 [32]
43	Aremogna - 5miglia system	13 - 23	55	SW	N dip-slip	0	15	0.1 - 0.5 [24] 0.2 [56] 0.1 - 0.3 [32]	0.2 - 0.6 [80]			2750-920 BP [74] 5685-4890 BP [74] 6950-5490 BP [74]	[8]
44	Marsicano Mt.	20	55-75	SW	N dip-slip	0	13	0.2 [37] 0.6 ± 0.2 [84] 1.0 [93]	0.5 - 0.7 [80]				[8]
45	Sora	23	55	SW	N dip-slip	0	11	0.3 [2]	0.15 - 0.45 [80]	24/07/1654 (M=6.33) [74]			[8]
46	Cassino	24	60	SW	N dip-slip	0	8-12	0.4 ± 0.2 [32] 0.22 - 0.33 [84]	0.3 - 0.5 [2]
47	Barrea system	17	55-60	WSW	N dip-slip	0	13	0.8 [59]	0.2 - 0.6 [80]		07/05/1984 (M= 5.86) [74]		[8]
48	Carpino - Le Piane	7	60	NE	N dip-slip	0	8-12		0.75 - 1.0 [26]
49	Aquae Iuliae	21	65	SW	N dip-slip	0	13		0.2 - 0.5 [32] 0.2 - 0.4 [23] 1.8 [43] 1.5 - 1.9 [43] 0.45 [43] 1.0 [43]	09/09/1349 (M= 6.8) [43]		847 AD [74] 346/355 AD [43]
50	Ailano-Piedimonte	18	60	SW	N dip-slip	0	13	0.15 ± 0.04 [7] 0.27 - 0.3 [7]					[33]
51	Matese Lake	36	65	SW	N dip-slip	0	13		0.5 - 1.0 [34]		29/12/2013 (M= 4.9)		[33]
52	Bojano	27	55	NE	N dip-slip	0	12-13	0.5 ± 0.2 [32] 0.2 ± 0.1 [32]	0.5 [82] 0.9 [49]	26/07/1805 (M= 6.68) [29]		2838-2472 BP	[33]
53	Frosolone	37	70	N	N lateral dx	11	25			30/12/1456 (M= 7) [35]			[29]
54	Ripabottoni-San Severo	69	85	N	Strike slip dx	6	25		0.1 - 0.5 [29]	30/07/1627 (M= 6.7) [29] 29/01/1657 (M= 5.96) [29] 5/5/1647 (M=5.69) [29]	20/09/1941 (M= 5.4) 31/10/2002 (M= 5.7) [92] 01/11/2002 (M= 5.7) [92]		[79]
55	Mattinata	43	80	N	Strike slip dx	0	25	0.7 ± 0.2 [89]	1.0 ± 0.2 [89] 0.7 - 0.8 [89]	6/12/1875 (M= 5.86) [29]	18/08/1948 (M=5.55) [29] 19/06/1975 (M= 5.0) 30/09/1995 (M= 5.2)		[79]
56	CastelluccioDeiSauri	93	80	N	Strike slip dx	11	22		0.1 - 0.5 [29]	17//1361 (M= 6.03) [29] 11/5/1560 (M= 5.66) [29] 20/03/1731 (M= 6.33) [29]
57	Benevento	25	55	SW	N dip-slip	0	8-12	0.2 [32]
58	Volturno	16	60	SW	N dip-slip	1	13	0.2 - 0.5 [23]
59	Tammaro Basin	25	60	NE	N dip-slip	0	13			05/06/1688 (M= 7.06) [27]			[29]
60	Ariano Irpino	30	70	NNE	N lateral dx	11	25			05/12/1456 (M= 6.9) [35] 21/08/1962 (M= 6.15)			[29]
61	Avella	20	55	SW	N dip-slip	1	13	0.2 [23] 0.4 - 0.6 [23] 0.2 - 0.5 [23]		12/05/1499 (M=5.57)
62	Ufita Valley	25	64	N	N lateral dx	1.5	14.5			29/11/1732 (M= 6.75) [29][55]
63	Bisaccia	32	64	NE	N lateral dx	1.5	15			23/7/1930 (M= 6.67) [29]
64	Melfi	17	80	N	Strike slip dx	12	22		0.1 - 0.5 [29]	14/08/1851 (M= 6.52)
65	Irpinia system	40	60-70	NE	N dip-slip	0	14	0.7 ± 0.3 [32] 0.25 - 0.35 [76]	0.4 - 0.6 [29] 0.4 [76] 0.3 [24] 2.5 [45]	15/01/1466 (M= 5.98) [45] 08/09/1694 (M= 6.76) [45]	23/11/1980 (M= 6.8)	1415-2750 BP [76] 3507-42838 BP [76] 4411-6736 [76] 6736-8600 BP [76] 11180-19660 [76]	[88]
66	Irpinia antithetic	15	70	SW	N dip-slip	0	11	0.2 - 0.5 [32]					[29]
67	Volturara	24	60	SW	N dip-slip	1	13	0.2 - 0.3 [32]
68	Potenza	18	88	N	Strike slip	15	21		0.1 - 0.5 [29]		05/05/1990 (M= 5.8) [9]		[34]
69	Palagianello	74	85	N	Strike slip	13	22		0.1 - 0.5 [29]				[34]
70	Val d'Agri	35	50	SW	N dip-slip	5	15	0.6 [23] 1.1 ± 0.4 [32] 0.83 [78]	1.0 [4]	16/12/1857 (M= 7.02) [4]			[14][63]
71	Monti della maddalena	26	60	NE	N dip-slip	0	13		0.25 - 0.35 [63]	*(2) 16/12/1857 (M= 6.5) [29]
72	Caggiano	17	60	SW	N dip-slip	0	12	0.3 - 0.4 [48] 0.4 [48]	0.4 [48]	19/08/1561 (M= 6.72) [48]		1400-1800 AD (1561?) [48] 2000 BP [48] 6504-5900 BP [48]
73	Melandro-Pergola	20	60	NE	N dip-slip	0	11		0.2 [71]	*(1) 16/12/1857 (M= 6.3) [29]
74	Vallo di Diano	35	60	SW	N dip-slip	0	12	0.41 - 0.44 [77] 0.5 - 1 [23] 1.0 [23] 0.6 - 0.7 [32]
75	Alburni	21	60	NE	N dip-slip	0	8	0.39 [77] 0.3 - 0.6 [32]
76	Maratea	20	60	WSW	N dip-slip	0	13	0.43 [77] 0.6 [32]
77	Monte Alpi	11	60	WSW	N dip-slip	0	13	0.55 [77] 0.3 - 0.8 [32]
78	Mercure	21	60	SW	N dip-slip	0	13	0.17 [77] 0.5 ± 0.2 [32]			08/01/1988 (M= 4.1) [65] 09/09/1998 (M= 5.53) [65]
79	Pollino	24	60	SW	N dip-slip	0	15	0.5 [37] 0.19 - 0.3 [77] 0.33 - 0.4 [64] 0.2 - 0.5 [32]
80	Castrovillari	11	60	W	N dip-slip	0	15	1.0 [20]	0.2 - 0.6 [29] 0.2 - 0.5 [19] 0.2 [19]			380 BC - 1200 AD [20][21][22] before 410 BC [20][21][22] 530 AD - 900 AD [20][21][22] 6860 BC - 410 BC [20][21][22]
81	Rossano	13	60	N	N dip-slip	0	22		0.5 - 0.6 [41]	25/04/1836 (M= 6.2) [41]		951 DC [41]
82	Crati	50	45	E	N dip-slip	0	15	0.8 - 1.0 [90] 1.0 [90] 0.6 - 0.9 [90]		24/05/1184 (M= 6.74) [90] 04/10/1870 (M= 6.24) [90]
83	Piano Lago - Decollatura	25	60	E	N dip-slip	1	15		0.2 - 0.5 [37]				[53]
84	Luzzi	8	65	W	N dip-slip	0	7			14/07/1767 (M= 5.89) [29]
85	Castiglione Cosentino	10	60	W	N dip-slip	0	8			12/10/1835 (M= 5.89) [29]
86	Cecita lake	16	60	W	N dip-slip	0	22		1.0 [69]				[52][53]
87	Lakes	25	60	SW	N dip-slip	0	22		1.2 [47] 1.4 [47]	08/06/1638 (M= 6.76) [47][54]		after 645-691 AD [47] before 789-893/776-900 AD [47] III secolo BC [47]	[52][53]
88	Fuscalto		60	SW	N dip-slip								[52]
89	Sant-Eufemia - Foroleto	30	80	S	Strike slip sx	3	20			28/03/1638 (M= 6.6) [47]			[53][68]
90	Stalletti - Maida	21	70-90	NE	Strike slip dx	3	20						[53][68]
91	Vibo	17	80	NW	N dip-slip	0	20						[68][83]
92	Serre	34	60	WNW	N dip-slip	0	15	0.6 - 1.0 [67] 0.6 - 0.7 [17] 0.8 - 1.0 [37] 0.7 [37]		05/11/1659 (M= 6.57) [54] 07/12/1743 (M= 5.88) [54] 07/02/1783 (M= 6.74) [54] 13/10/1791 (M= 6.14)			[68][83]
93	S. Eufemia gulf	25	40	ESE	N dip-slip	1	11		0.1 - 0.3 [61]	08/09/1905 (M= 6.94) [61]
94	Capo Vaticano	14	60	NW	N dip-slip	0	8		1.5 [17]				[68][83]
95	Coccorino-Nicotera	13	70	S	N lateral sx	3	11			07/03/1928 (M= 5.87) [29]			[68][83]
96	Cittanova	30	60-70	WNW	N dip-slip	0	13	0.6 - 0.7 [90] 0.8 - 1.0 [90] 0.7 [90] 0.7 [67] 1.2 [17] 0.6 - 0.9 [37] 1.0 [37] 0.44 [46] 0.4 [46] 0.6 ± 0.1 [44]		05/02/1783 (M= 7.1) [44][47] 1509 (M= 5.56)		255-390 AD [46] after 5300-4000 BP [46] IV AD [44] 5785 ± 490 BP [44] 10215 ± 300 [44] 12880 ± 200 BP [44]	[68][83]
97	S.Eufemia	20	60	NW	N dip-slip	0	13	0.7 [90]		16/11/1894 (M= 6.12) [67]			[68][83]
98	Delianuova	19	-	NW	N dip-slip	-	13						[68][83]
99	Scilla	30	60	NW	N dip-slip	0	13	0.7 [67] 1.1 - 1.3 [17]					[68][83]
100	Reggio Calabria	27	60	W	N dip-slip	0	13	0.6 [90] 1.4 ± 0.3 [17] 1.2 - 1.7 [17]					[68][83]
101	Armo	14	60	NW	N dip-slip	0	13		0.45 [1]				[68][83]
102	Taormina	39	30	SE	N dip-slip	3	13	1.0 [67] 1.3 ± 0.3 [17] 0.9 - 1.4 [91]	0.93 - 2.0 [29]	28/12/1908 (M= 7.1) [29]		300-400 AD [29]	[68][83]
103	Piedimonte	11	60	E	N dip-slip	0	5	1.7 [66] 1.1 - 1.2 [66]					[68][83]
104	Acireale	27	60	E	N dip-slip	0	15	1.5 - 2.0 [66] 1 - 2.1 [66] 2.1 [66] 1.4 - 1.8 [66] 1.4 [66] 1.1 - 1.9 [66]		20/02/1818 (M= 6.28) [17][66]			[68][83]
105	Western Ionian	50	60-70	E	N dip-slip	-	15		1.2 [67]	11/01/1693 (M=7.32) [5]			[68][83]
106	Eastern Ionian	40	60-70	E	N dip-slip	-	15						[68][83]
107	Avola	27	60	SW	N dip-slip	0	16	0.7 [5] 1.2 - 1.4 [17]					[68][83]
108	Rosolini-Ispica	19	60	SW	N dip-slip	0	15						[68][83]
109	Mt. Climiti	15	60	NE	N dip-slip	0	15						[68][83]

## Sheet: Seismogenic Sources
Id	Name	ScR	Length (km)	Dip (°)	Rake	ST (km)	SRmin	SRmax	Mobs	sdMobs	Last_eq_time	Mmax	sdMmax	Tmean (year)	Mo-rate
1	Lunigiana	WC94-N	43.8	40	-90	5	0.28	0.7	5.83	0.15	182	6.5	0.4	4830	1465700000000000
2	North Apuane Transfer	all dip	25.5	45	-90	7	0.33	0.83	5.81	0.2	179	6.3	0.3	1227	2891700000000000
3	Garfagnana	WC94-N	26.9	30	-90	4.5	0.35	0.57	6.48	0.09	94	6.4	0.3	2813	1781700000000000
4	Garfagnana Transfer	WC94-S	47.1	90	0	5	0.33	0.83	NaN	NaN	NaN	6.4	0.5	7379	679210000000000
5	Mugello	WC94-N	21	40	-90	7	0.33	0.83	6.29	0.09	97	6.4	0.2	1583	3166100000000000
6	Ronta	WC94-N	19.3	65	-90	7	0.17	0.5	NaN	NaN	NaN	6.2	0.3	2538	989710000000000
7	Poppi	WC94-N	17.1	40	-90	4.5	0.33	0.83	NaN	NaN	NaN	6.1	0.3	1232	1443400000000000
8	Città di Castello	WC94-N	22.9	40	-90	3	0.25	1.2	5.99	0.34	227	6.1	0.4	1962	906360000000000
9	M.S.M. Tiberina	WC94-N	10.5	40	-90	2.5	0.25	0.75	6.44	0.54	99	5.8	0.4	1359	464280000000000
10	Gubbio	WC94-N	23.6	50	-90	6	0.4	1.2	5.65	0.09	32	6.2	0.3	1037	2422300000000000
11	Colfiorito System	WC94-N	45.9	50	-90	8	0.25	0.9	6.31	0.33	19	6.6	0.4	3437	2909500000000000
12	Umbria Valley	WC94-N	51.1	55	-90	4.5	0.4	1.2	6.33	0.14	162	6.5	0.5	5390	1313400000000000
13	Vettore-Bove	WC94-N	35.4	50	-90	15	0.2	1.05	Nan	NaN	NaN	6.8	0.3	1971	1.0123e+16
14	Nottoria-Preci	WC94-N	29	50	-90	12	0.2	1	6.73	0.11	NaN	6.6	0.3	1564	6393900000000000
15	Cascia-Cittareale	WC94-N	24.3	50	-90	13.5	0.2	1	5.99	0.32	NaN	6.4	0.3	650	7710600000000000
16	Leonessa	WC94-N	14.9	55	-90	12	0.1	0.7	NaN	NaN	NaN	6.2	0.3	959	2619300000000000
17	Rieti	WC94-N	17.6	50	-90	10	0.25	0.6	6.2	0.34	118	6.3	0.3	1211	2929900000000000
18	Fucino	WC94-N	82.3	50	-90	13	0.3	1.6	7	0.09	101	7.1	0.4	4783	1.1757e+16
19	Sella di Corno	WC94-N	23.1	60	-90	13	0.35	0.7	NaN	NaN	NaN	6.5	0.2	1370	5167500000000000
20	Pizzoli-Pettino	WC94-N	21.3	50	-90	14	0.3	1	6.72	0.17	314	6.5	0.2	933	7587800000000000
21	Montereale	WC94-N	15.1	50	-90	14	0.25	0.9	NaN	NaN	NaN	6.3	0.3	745	4762600000000000
22	Gorzano	WC94-N	28.1	50	-90	15	0.2	1	5.93	0.4	377	6.6	0.3	1029	9718200000000000
23	Gran Sasso	WC94-N	28.4	50	-90	15	0.35	1.2	NaN	NaN	NaN	6.6	0.2	797	1.2547e+16
24	Paganica	WC94-N	23.7	50	-90	14	0.4	0.9	6.41	0.34	7	6.5	0.2	838	8448000000000000
25	Middle Aternum Valley	WC94-N	29.1	50	-90	14	0.15	0.45	NaN	NaN	NaN	6.6	0.2	2344	4266200000000000
26	Campo Felice-Ovindoli	WC94-N	26.2	50	-90	13	0.2	1.6	NaN	NaN	NaN	6.3	0.5	319	1.1123e+16
27	Carsoli	WC94-N	20.5	50	-90	11	0.35	0.6	NaN	NaN	NaN	6.4	0.2	1195	4194000000000000
28	Liri	WC94-N	42.5	50	-90	11	0.3	1.26	NaN	NaN	NaN	6.8	0.3	2822	7070400000000000
29	Sora	WC94-N	20.4	50	-90	11	0.15	0.45	6.29	0.2	362	6.4	0.2	1901	2636400000000000
30	Marsicano	WC94-N	20	50	-90	13	0.25	1.2	NaN	NaN	NaN	6.5	0.2	959	7382100000000000
31	Sulmona	WC94-N	22.6	50	-90	15	0.6	1.35	NaN	NaN	NaN	6.5	0.2	547	1.2942e+16
32	Maiella	WC94-N	21.4	55	-90	15	0.7	1.6	NaN	NaN	NaN	6.5	0.2	524	1.351e+16
33	Aremogna C.Miglia	WC94-N	13.1	50	-90	15	0.1	0.6	NaN	NaN	NaN	6.2	0.3	933	2692300000000000
34	Barrea	WC94-N	17.1	55	-90	13	0.2	1	5.9	0.09	32	6.3	0.3	726	4887200000000000
35	Cassino	WC94-N	24.6	60	-90	11	0.25	0.5	NaN	NaN	NaN	6.5	0.2	2611	2711400000000000
36	Ailano-Piedimonte	WC94-N	17.6	60	-90	12	0.15	0.35	NaN	NaN	NaN	6.3	0.3	1940	1828900000000000
37	Matese	WC94-N	48.3	60	-90	13	0.2	1.9	6.8	0.36	667	6.8	0.3	1930	1.0338e+16
38	Bojano	WC94-N	35.5	55	-90	13	0.2	0.9	6.62	0.11	211	6.7	0.3	2352	6005700000000000
39	Frosolone	WC94-N	36.1	70	-90	14	0.35	0.93	7	0.09	560	6.8	0.3	2636	7569300000000000
40	Ripabottoni-San Severo	WC94-S	68.3	85	0	19	0.1	0.5	6.77	0.2	NaN	7.1	0.3	6585	8539700000000000
41	Mattinata	WC94-S	42.3	85	0	25	0.7	1	5.99	0.2	NaN	6.9	0.3	1041	2.7074e+16
42	Castelluccio dei Sauri	WC94-S	93.2	90	0	11	0.1	0.5	6.53	0.25	285	6.9	0.4	11081	2543400000000000
43	Ariano Irpino	WC94-N	30.1	70	-90	14	0.35	0.93	6.9	0.09	560	6.7	0.3	1866	7569900000000000
44	Tammaro	WC94-N	25	60	-90	13	0.35	0.93	6.98	0.12	327	6.6	0.3	1587	6301200000000000
45	Benevento	WC94-N	25	55	-90	10	0.35	0.93	NaN	NaN	NaN	6.5	0.2	1646	4301000000000000
46	Volturno	WC94-N	15.7	60	-90	12	0.23	0.57	NaN	NaN	NaN	6.2	0.3	962	2611100000000000
47	Avella	WC94-N	20.5	55	-90	12	0.2	0.7	5.57	0.2	NaN	6.2	0.5	620	4051400000000000
48	Ufita-Bisaccia	WC94-N	59	64	-90	13.5	0.35	0.93	6.62	0.11	86	6.9	0.3	3661	7698400000000000
49	Melfi	WC94-S	17.2	80	0	10	0.1	0.5	6.38	0.17	165	6.3	0.3	2257	1572100000000000
50	Irpinia Antithetic	WC94-N	15	60	-90	11	0.2	0.53	NaN	NaN	NaN	6.2	0.3	1204	2086300000000000
51	Irpinia	WC94-N	39.7	65	-90	14	0.3	2.5	6.9	0.09	36	6.8	0.3	1373	1.4532e+16
52	Volturara	WC94-N	23.7	60	-90	12	0.2	0.35	NaN	NaN	NaN	6.5	0.2	3033	2334100000000000
53	Alburni	WC94-N	20.4	60	-90	8	0.35	0.7	NaN	NaN	NaN	6.3	0.3	1666	2129700000000000
54	Caggiano-Diano Valley	WC94-N	46	60	-90	12	0.35	1.15	Nan	NaN	NaN	6.8	0.3	3135	6364500000000000
55	Pergola-Maddalena	WC94-N	50.6	60	-90	13	0.2	0.93	6.5	0.08	159	6.8	0.3	3587	5562500000000000
56	Agri	WC94-N	34.9	50	-90	10	0.8	1.3	NaN	NaN	NaN	6.6	0.3	1253	7980800000000000
57	Potenza	WC94-S	17.8	90	0	6	0.1	0.5	5.8	0.09	26	6	0.3	2161	582570000000000
58	Palagianello	WC94-S	73.3	90	0	9	0.1	0.5	NaN	NaN	NaN	6.9	0.4	17635	1598200000000000
59	Monte Alpi	WC94-N	10.9	60	-90	13	0.35	0.9	NaN	NaN	NaN	6.1	0.3	580	3066000000000000
60	Maratea	WC94-N	21.6	60	-90	13	0.46	0.7	NaN	NaN	NaN	6.5	0.2	1255	5641000000000000
61	Mercure	WC94-N	25.8	60	-90	13	0.2	0.6	5.6	0.09	18	6.5	0.2	1798	3937400000000000
62	Pollino	WC94-N	23.8	60	-90	15	0.22	0.58	NaN	NaN	NaN	6.5	0.2	1431	4947200000000000
63	Castrovillari	WC94-N	10.3	60	-90	15	0.2	1.15	NaN	NaN	NaN	6.1	0.3	492	3614400000000000
64	Rossano	WC94-N	14.9	60	-90	22	0.5	0.6	6.2	0.25	180	6.3	0.3	568	6246700000000000
65	Crati West	WC94-N	49.7	45	-90	15	0.84	1.4	6.74	0.44	146	6.9	0.3	1335	2.1111e+16
66	Crati East	WC94-N	18.4	60	-90	8	0.75	1.45	5.98	0.61	181	6.2	0.3	563	4461600000000000
67	Lakes	WC94-N	43.6	60	-90	22	0.75	1.45	6.89	0.25	378	6.9	0.3	965	2.9206e+16
68	Fuscalto	WC94-N	21.05	60	-90	20	0.75	1.45	NaN	NaN	NaN	6.6	0.3	622	1.6077e+16
69	Piano Lago-Decollatura	WC94-N	25	60	-90	14	0.23	0.57	NaN	NaN	NaN	6.5	0.2	1566	4520700000000000
70	Catanzaro North	WC94-S	29.5	80	0	17	0.75	1.45	6.6	0.12	378	6.7	0.3	841	1.6796e+16
71	Catanzaro South	WC94-S	21.3	80	0	17	0.75	1.45	6.06	0.82	NaN	6.3	0.4	292	1.2151e+16
72	Serre	WC94-N	31.6	60	-90	15	0.7	1.15	6.62	0.11	233	6.7	0.3	1188	1.189e+16
73	Vibo	WC94-N	23	80	-90	15	0.75	1.45	NaN	NaN	NaN	6.5	0.2	636	1.1131e+16
74	Sant'Eufemia Gulf	WC94-N	24.8	40	-90	10	0.11	0.3	7.04	0.16	111	6.6	0.3	4637	2156600000000000
75	Capo Vaticano	WC94-N	13.7	60	-90	8	0.75	1.45	NaN	NaN	NaN	6.1	0.3	426	4174400000000000
76	Coccorino	WC94-N	13.3	70	-90	8	0.75	1.45	5.83	0.26	88	6	0.3	337	3735700000000000
77	Scilla	WC94-N	29.7	60	-90	13	0.8	1.5	NaN	NaN	NaN	6.6	0.2	883	1.1325e+16
78	Sant'Eufemia	WC94-N	19.2	60	-90	13	0.75	1.45	6.07	0.1	122	6.4	0.2	527	9510200000000000
79	Cittanova-Armo	WC94-N	63.8	60	-90	13	0.45	1.45	7.02	0.08	233	7	0.4	4257	9351800000000000
80	Reggio Calabria	WC94-N	27.2	60	-90	13	0.7	2	NaN	NaN	NaN	6.5	0.2	533	1.3282e+16
81	Taormina	WC94-N	38.7	30	-90	10	0.9	2.6	7.1	0.15	106	6.9	0.3	955	2.9512e+16
82	Acireale	WC94-N	39.4	60	-90	15	1.15	2.3	6.23	0.12	NaN	6.7	0.3	637	2.2175e+16
83	Western Ionian	WC94-N	50.1	65	-90	15	0.75	1.45	7.41	0.15	323	6.9	0.3	2170	1.2988e+16
84	Eastern Ionian	WC94-N	39.3	65	-90	15	0.75	1.45	NaN	NaN	NaN	6.8	0.3	1536	1.299e+16
85	Climiti	WC94-N	15.7	60	-90	15	0.75	1.45	NaN	NaN	NaN	6.3	0.3	395	8982600000000000
86	Avola	WC94-N	46.9	60	-90	16	0.8	1.6	6.21	0.31	323	6.9	0.3	1618	1.7419e+16

## Sheet: References
[1] Aloisi, M., V. Bruno, F. Cannavo, L. Ferranti, M. Mattia, C. Monaco, and M. Palano. 2013. 'Are the source models of the M 7.1 1908 Messina Straits earthquake reliable? Insights from a novel inversion and a sensitivity analysis of levelling data', Geophysical Journal International, 192: 1025-41.
[2] Barchi, M., F. Galadini, G. Lavecchia, P. Messina, A.M. Michetti, L. Peruzza, A. Pizzi, E. Tondi, and E. Vittori. 2000. Sintesi delle conoscenze sulle faglie attive in Italia centrale. CNR - Gruppo Nazionale per la Difesa dai Terremoti, Rome, Italy, 62 pp.
[3] Basili, R., G. Valensise, P. Vannoli, P. Burrato, U. Fracassi, S. Mariano, M. M. Tiberti, and E. Boschi. 2008. 'The Database of Individual Seismogenic Sources (DISS), version 3: Summarizing 20 years of research on Italy's earthquake geology', Tectonophysics, 453: 20-43.
[4] Benedetti, L., P. Tapponnier, G. C. P. King, and L. Piccardi. 1998. 'Surface Rupture of the 1857 Southern Italian earthquake?', Terra Nova, 10: 206-10.
[5] Bianca, M., C. Monaco, L. Tortorici, and L. Cernobori. 1999. 'Quaternary normal faulting in southeastern Sicily (Italy): A seismic source for the 1693 large earthquake', Geophysical Journal International, 139: 370-94.
[6] Boncio, P., F. Brozzetti, and G. Lavecchia. 2000. 'Architecture and seismotectonics of a regional low-angle normal fault zone in central Italy', Tectonics, 19: 1038-55.
[7] Boncio, P., A. M. Dichiarante, E. Auciello, M. Saroli, and F. Stoppa. 2016. 'Normal faulting along the western side of the Matese Mountains: Implications for active tectonics in the Central Apennines (Italy)', Journal of Structural Geology, 82: 16-36.
[8] Boncio, P., G. Lavecchia, and B. Pace. 2004. 'Defining a model of 3D seismogenic sources for Seismic Hazard Assessment applications: The case of central Apennines (Italy)', Journal of Seismology, 8: 407-25.
[9] Boncio, P., T. Mancini, G. Lavecchia, and G. Selvaggi. 2007. 'Seismotectonics of strike-slip earthquakes within the deep crust of southern Italy: Geometry, kinematics, stress field and crustal rheology of the Potenza 1990-1991 seismic sequences (M-max 5.7)', Tectonophysics, 445: 281-300.
[10] Brozzetti, F., P. Boncio, D.P. Tinari, D. Di Naccio and L. Torelli. 2007. A multidisciplinary approach to the seismotectonics of the Lunigiana and Garfagnana extensional basins (Northern Tuscany, Italy). Rendiconti della Società Geologica Italiana, 4: 164-165.
[11] Brozzetti, F. 2011. 'The Campania-Lucania Extensional Fault System, southern Italy: A suggestion for a uniform model of active extension in the Italian Apennines', Tectonics, 30.
[12] Brozzetti, F., P. Boncio, G. Lavecchia, and B. Pace. 2009. 'Present activity and seismogenic potential of a low-angle normal fault system (Citta di Castello, Italy): Constraints from surface geology, seismic reflection data and seismicity', Tectonophysics, 463: 31-46.
[13] Burrato, P., M. E. Poli, P. Vannoli, A. Zanferrari, R. Basili, and F. Galadini. 2008. 'Sources of M-w 5+ earthquakes in northeastern Italy and western Slovenia: An updated view based on geological and seismological evidence', Tectonophysics, 453: 157-76.
[14] Burrato, P., and G. Valensise. 2008. 'Rise and fall of a hypothesized seismic gap: Source complexity in the M-w 7.0 16 December 1857 southern Italy earthquake', Bulletin of the Seismological Society of America, 98: 139-48.
[15] Calabro, R. A., S. Corrado, D. Di Bucci, P. Robustini, and M. Tornaghi. 2003. 'Thin-skinned vs. thick-skinned tectonics in the Matese Massif, Central-Southern Apennines (Italy)', Tectonophysics, 377: 269-97.
[16] Calamita, F., M. Coltorti, D. Piccinini, P. P. Pierantoni, A. Pizzi, M. Ripepe, V. Scisciani, and E. Turco. 2000. 'Quaternary faults and seismicity in the Umbro-Marchean Apennines (Central Italy): evidence from the 1997 Colfiorito earthquake', Journal of Geodynamics, 29: 245-64.
[17] Catalano, S., G. De Guidi, C. Monaco, G. Tortorici, and L. Tortorici. 2008. 'Active faulting and seismicity along the Siculo-Calabrian Rift Zone (Southern Italy)', Tectonophysics, 453: 177-92.
[18] Cello, G., S. Mazzoli, E. Tondi, and E. Turco. 1997. 'Active tectonics in the central Apennines and possible implications for seismic hazard analysis in peninsular Italy', Tectonophysics, 272: 43-68.
[19] Cinti, F. R., L. Cucci, D. Pantosti, G. DAddezio, and M. Meghraoui. 1997. 'A major seismogenic fault in a 'silent area': the Castrovillari fault (southern Apennines, Italy)', Geophysical Journal International, 130: 595-605.
[20] Cinti, F. R., M. Moro, D. Pantosti, L. Cucci, and G. D'Addezio. 2002. 'New constraints on the seismic history of the Castrovillari fault in the Pollino gap (Calabria, southern Italy)', Journal of Seismology, 6: 199-217.
[21] Cinti, F. R., D. Pantosti, P. M. De Martini, S. Pucci, R. Civico, S. Pierdominici, L. Cucci, C. A. Brunori, S. Pinzi, and A. Patera. 2011. 'Evidence for surface faulting events along the Paganica fault prior to the 6 April 2009 L'Aquila earthquake (central Italy)', Journal of Geophysical Research-Solid Earth, 116.
[22] Cinti, F. R., C. Pauselli, F. Livio, M. Ercoli, C. A. Brunori, M. F. Ferrario, R. Volpe, R. Civico, D. Pantosti, S. Pinzi, P. M. De Martini, G. Ventura, L. Alfonsi, R. Gambillara, and A. M. Michetti. 2015. 'Integrating multidisciplinary, multiscale geological and geophysical data to image the Castrovillari fault (Northern Calabria, Italy)', Geophysical Journal International, 203: 1847-63.
[23] Cinque, A., A. Ascione, and Caiazzo. 2000. Distribuzione spazio-temporale e caratterizzazione della fagliazione quaternaria in Appennino meridionale. 2000. in: Galadini F., Meletti C., and Rebez A. (Eds), Le ricerche del GNDT nel campo della pericolosita sismica (1996-1999), CNR-Gruppo Nazionale per la Difesa dai Terremoti - Roma, 203-218.
[24] D'Addezio, G., E. Masana, and D. Pantosti. 2001. 'The Holocene paleoseismicity of the Aremogna-Cinque Miglia fault (Central Italy)', Journal of Seismology, 5: 181-205.
[25] Delle Donne, D., L. Piccardi, F. Sani and G. Vannucci. 2003. Active Tectonics of the Mugello Basin (Northern Apennines, Italy). Geophysical Research Abstracts. 5: 06229.
[26] Di Bucci, D., S. Corrado, and G. Naso. 2002. 'Active faults at the boundary between Central and Southern Apennines (Isernia, Italy)', Tectonophysics, 359: 47-63.
[27] Di Bucci, D., B. Massa, M. Tornaghi, and A. Zuppetta. 2005. 'Structural setting of the 1688 Sannio earthquake epicentral area (Southern Italy) from surface and subsurface data', Journal of Geodynamics, 40: 294-315.
[28] Di Naccio, D., P. Boncio, F. Brozzetti, F. J. Pazzaglia, and G. Lavecchia. 2013. 'Morphotectonic analysis of the Lunigiana and Garfagnana grabens (northern Apennines, Italy): Implications for active normal faulting', Geomorphology, 201: 293-311.
[29] DISS Working Group. 2015. Database of Individual Seismogenic Sources (DISS), Version 3.2.0: A compilation of potential sources for earthquakes larger than M 5.5 in Italy and surrounding areas. http://diss.rm.ingv.it/diss/, Istituto Nazionale di Geofisica e Vulcanologia; DOI:10.6092/INGV.IT-DISS3.2.0
[30] Eva, E., S. Solarino, and P. Boncio. 2014. 'HypoDD relocated seismicity in northern Apennines (Italy) preceding the 2013 seismic unrest: seismotectonic implications for the Lunigiana-Garfagnana area', Bollettino Di Geofisica Teorica Ed Applicata, 55: 739-54.
[31] Falcucci, E., S. Gori, M. Moro, A. R. Pisani, D. Melini, F. Galadini, and P. Fredi. 2011. 'The 2009 L'Aquila earthquake (Italy): What's next in the region? Hints from stress diffusion analysis and normal fault activity', Earth and Planetary Science Letters, 305: 350-58.
[32]Faure-Walker J. 2014. Mechanics of continental extension from Quaternary strain fields in the Italian Apennines. PhD Thesis, pp 405.
[33] Ferranti, L., G. Milano, P. Burrato, M. Palano, and F. Cannavo. 2015. 'The seismogenic structure of the 2013-2014 Matese seismic sequence, Southern Italy: implication for the geometry of the Apennines active extensional belt', Geophysical Journal International, 201: 823-37.
[34] Ferranti, L., M. Palano, F. Cannavo, M. E. Mazzella, J. S. Oldow, E. Gueguen, M. Mattia, and C. Monaco. 2014. 'Rates of geodetic deformation across active faults in southern Italy', Tectonophysics, 621: 101-22.
[35] Fracassi, U., and G. Valensise. 2007. 'Unveiling the sources of the catastrophic 1456 multiple earthquake: Hints to an unexplored tectonic mechanism in southern Italy', Bulletin of the Seismological Society of America, 97: 725-48.
[36] Galadini, F. and P. Galli. 2000. Active Tectonics in the Central Apennines (Italy) - Input Data for Seismic Hazard Assessment. Natural Hazards, 22: 225-270.
[37] Galadini, F., C. Meletti, E. Vittori. 2000. Stato delle conoscenze sulle faglie attive in Italia: elementi geologici di superficie. In: Galadini F., Meletti C., Rebez A. (Eds.), Le ricerche del GNDT nel campo della percolosità sismica (1996-1999), 107-136.
[38] Galadini, F., and P. Galli. 2003. 'Paleoseismology of silent faults in the central Apennines (Italy): the Mt. Vettore and Laga Mts. Faults', Annals of Geophysics, 46: 815-36.
[39] Galadini, F., P. Galli, and M. Moro. 2003. 'Paleoseismology of silent faults in the central Apennines (Italy): the Campo Imperatore Fault (Gran Sasso Range Fault System)', Annals of Geophysics, 46: 793-813.
[40] Galadini, F., M. E. Poli, and A. Zanferrari. 2005. 'Seismogenic sources potentially responsible for earthquakes with M >= 6 in the eastern Southern Alps (Thiene-Udine sector, NE Italy)', Geophysical Journal International, 161: 739-62.
[41] Galli P., V. Spina, I. Ilardo and G. Naso. 2010. Evidence of Active Tectonics in Southern Italy: The Rossano Fault (Calabria). In: Recent Progress on Earthquake Geology. ISBN: 978-1-60876-147-0, pp. 49-78.
[42] Galli, P. A. C., B. Giaccio, P. Messina, E. Peronace, and G. M. Zuppi. 2011. 'Palaeoseismology of the L'Aquila faults (central Italy, 2009, M-w 6.3 earthquake): implications for active fault linkage', Geophysical Journal International, 187: 1119-34.
[43] Galli, P. A. C., and J. A. Naso. 2009. 'Unmasking the 1349 earthquake source (southern Italy): paleoseismological and archaeoseismological indications from the Aquae Iuliae fault', Journal of Structural Geology, 31: 128-49.
[44] Galli, P. A. C., and E. Peronace. 2015. 'Low slip rates and multimillennial return times for M-w 7 earthquake faults in southern Calabria (Italy)', Geophysical Research Letters, 42: 5258-65.
[45] Galli, P. A. C., E. Peronace, B. Quadrio, and G. Esposito. 2014. 'Earthquake fingerprints along fault scarps: A case study of the Irpinia 1980 earthquake fault (southern Apennines)', Geomorphology, 206: 97-106.
[46] Galli, P., and V. Bosi. 2002. 'Paleoseismology along the Cittanova fault: Implications for seismotectonics and earthquake recurrence in Calabria (southern Italy)', Journal of Geophysical Research-Solid Earth, 107.
[47] Galli, P., and V. Bosi. 2003. 'Catastrophic 1638 earthquakes in Calabria (southern Italy): New insights from paleoseismological investigation', Journal of Geophysical Research-Solid Earth, 108.
[48] Galli, P., V. Bosi, S. Piscitelli, A. Giocoli, and V. Scionti. 2006. 'Late Holocene earthquakes in southern Apennine: paleoseismology of the Caggiano fault', International Journal of Earth Sciences, 95: 855-70.
[49] Galli, P., and F. Galadini. 2003. 'Disruptive earthquakes revealed by faulted archaeological relics in Samnium (Molise, southern Italy)', Geophysical Research Letters, 30.
[50] Galli, P., F. Galadini, and F. Calzoni. 2005. 'Surface faulting in Norcia (central Italy): a "paleoseismological perspective"', Tectonophysics, 403: 117-30.
[51] Galli, P., F. Galadini, and D. Pantosti. 2008. 'Twenty years of paleoseismology in Italy', Earth-Science Reviews, 88: 89-117.
[52] Galli, P., A. Ruga, V. Scionti, and R. Spadea. 2006. 'Archaeoseismic evidence for a Late Roman earthquake in the Crotone area (Ionian Calabria, Southern Italy): Seismotectonic implications', Journal of Seismology, 10: 443-58.
[53] Galli, P., and V. Scionti. 2006. 'Two unknown M > 6 historical earthquakes revealed by palaeoseismological and archival researches in eastern Calabria (southern Italy). Seismotectonic implications', Terra Nova, 18: 44-49.
[54] Galli, P., V. Scionti, and V. Spina. 2007. 'New paleoseismic data from the Lakes and Serre faults: seismotectonic implications for Calabria (Southern Italy)', Bollettino Della Societa Geologica Italiana, 126: 347-64.
[55] Giocoli, A., P. Burrato, P. Galli, V. Lapenna, S. Piscitelli, E. Rizzo, G. Romano, A. Siniscalchi, C. Magri, and P. Vannoli. 2008. Using ERT method in tectonically active areas: hints from Southern Apennine (Italy). Advances in Geosciences, 19: 61-65.
[56] Giraudi, C. 1989. 'Lake Levels and Climate for the Last 30,000 Years in the Fucino Area (Abruzzo-Central Italy) - a Review', Palaeogeography Palaeoclimatology Palaeoecology, 70: 249-60.
[57] Giraudi, C., and M. Frezzotti. 1995. 'Paleoseismicity in the Gran-Sasso Massif (Abruzzo, Central Italy)', Quaternary International, 25: 81-93.
[58] Kastelic, V., P. Vannoli, P. Burrato, U. Fracassi, M. M. Tiberti, and G. Valensise. 2013. 'Seismogenic sources in the Adriatic Domain', Marine and Petroleum Geology, 42: 191-213.
[59] Lavecchia, G., P. Boncio, F. Brozzetti, R. De Nardis, B. Pace and F. Visini. 2006. Studio della Pericolosità sismica della Regione Abruzzo. Lavoro realizzato nell’ambito della Convenzione fra Regione Abruzzo e Università “G. D’Annunzio” di Chieti dal titolo “Studio della Pericolosità sismica della Regione Abruzzo e ulteriori attività di supporto tecnico-scientifico da realizzare nell’amb…
[60] Lavecchia, G., P. Boncio, F. Brozzetti, R. de Nardis, and F. Visini. 2009. The contribution of structural geology and regional tectonics to the definition of large‐scale seismotectonic provinces and individual seis- mogenic sources: Application to the extensional belt of central Italy, in Recent Progress on Earthquake Geology, edited by P. Guarnieri, pp. 165–188, Nova Sci., New York.
[61] Loreto, M. F., U. Fracassi, A. Franzo, P. Del Negro, F. Zgur, and L. Facchin. 2013. 'Approaching the seismogenic source of the Calabria 8 September 1905 earthquake: New geophysical, geological and biochemical data from the S. Eufemia Gulf (S Italy)', Marine Geology, 343: 62-75.
[62] Maesano, F. E., G. Toscani, P. Burrato, F. Mirabella, C. D'Ambrogi, and R. Basili. 2013. 'Deriving thrust fault slip rates from geological modeling: Examples from the Marche coastal and offshore contraction belt, Northern Apennines, Italy', Marine and Petroleum Geology, 42: 122-34.
[63] Maschio, L., L. Ferranti, and P. Burrato. 2005. 'Active extension in Val d'Agri area, Southern Apennines, Italy: implications for the geometry of the seismogenic belt', Geophysical Journal International, 162: 591-609.
[64] Michetti, A.M., F. Brunamonte, L. Serva and R.A. Whitney. 1995. Seismic hazard assessment from paleoseismological evidence in the Rieti region, central Italy, In: L. Serva and D.B. Slemmons (eds), Perspectives in Paleoseismology, Bulletin of the Association of Engineering Geologists, Special Publication No 6: “Perspectives in Paleoseismology”, 63-82.
[65] Michetti, A.M., L. Ferreli, E. Esposito, S. Porfido, A.M. Blumetti, E. Vittori, L. Serva and G.P. Roberts. 2000. Ground Effects during the 9 September 1998, Mw = 5.6, Lauria Earthquake and the seismic potential of the aseismic Pollino Region in Southern Italy. Seismological Research Letters, 71: 31-46.
[66] Monaco, C., P. Tapponnier, L. Tortorici, and P. Y. Gillot. 1997. 'Late Quaternary slip rates on the Acireale-Piedimonte normal faults and tectonic origin of Mt. Etna (Sicily)', Earth and Planetary Science Letters, 147: 125-39.
[67] Monaco, C., and L. Tortorici. 2000. 'Active faulting in the Calabrian arc and eastern Sicily', Journal of Geodynamics, 29: 407-24.
[68] Monaco, C., and L. Tortorici. 2007. 'Active faulting and related tsunamis in eastern Sicily and south-western Calabria', Bollettino Di Geofisica Teorica Ed Applicata, 48: 163-84.
[69] Moretti A. 2000. Il database delle faglie capaci della Calabria: stato attuale delle conoscenze.
[70] Morewood, N. C., and G. P. Roberts. 2000. 'The geometry, kinematics and rates of deformation within an en echelon normal fault segment boundary, central Italy', Journal of Structural Geology, 22: 1027-47.
[71] Moro, M., L. Amicucci, F. R. Cinti, F. Doumaz, P. Montone, S. Pierdominici, M. Saroli, S. Stramondo, and B. Di Fiore. 2007. 'Surface evidence of active tectonics along the Pergola-Melandro fault: A critical issue for the seismogenic potential of the southern Apennines, Italy', Journal of Geodynamics, 44: 19-32.
[72] Moro, M., S. Gori, E. Falcucci, M. Saroli, F. Galadini, and S. Salvi. 2013. 'Historical earthquakes and variable kinematic behaviour of the 2009 L'Aquila seismic event (central Italy) causative fault, revealed by paleoseismological investigations', Tectonophysics, 583: 131-44.
[73] Pace, B., G. M. Bocchini, and P. Boncio. 2014. 'Do static stress changes of a moderate-magnitude earthquake significantly modify the regional seismic hazard? Hints from the L'Aquila 2009 normal-faulting earthquake (Mw 6.3, central Italy)', Terra Nova, 26: 430-39.
[74] Pace, B., L. Peruzza, G. Lavecchia, and P. Boncio. 2006. 'Layered seismogenic source model and probabilistic seismic-hazard analyses in central Italy', Bulletin of the Seismological Society of America, 96: 107-32.
[75] Pantosti, D., G. DAddezio, and F. R. Cinti. 1996. 'Paleoseismicity of the Ovindoli-Pezza fault, central Apennines, Italy: A history including a large, previously unrecorded earthquake in the Middle Ages (860-1300 AD)', Journal of Geophysical Research-Solid Earth, 101: 5937-59.
[76] Pantosti, D., D. P. Schwartz, and G. Valensise. 1993. 'Paleoseismology Along the 1980 Surface Rupture of the Irpinia Fault - Implications for Earthquake Recurrence in the Southern Apennines, Italy', Journal of Geophysical Research-Solid Earth, 98: 6561-&.
[77] Papanikolaou, I. D., and G. P. Roberts. 2007. 'Geometry, kinematics and deformation rates along the active normal fault system in the southern Apennines: Implications for fault growth', Journal of Structural Geology, 29: 166-88.
[78] Papanikolaou, I. D., G. P. Roberts, and A. M. Michetti. 2005. 'Fault scarps and deformation rates in Lazio-Abruzzo, Central Italy: Comparison between geological fault slip-rate and GPS data', Tectonophysics, 408: 147-76.
[79] Patacca, E., and P. Scandone. 2004. 'The 1627 Gargano earthquake (Southern Italy): Identification and characterization of the causative fault', Journal of Seismology, 8: 259-73.
[80] Peruzza, L., B. Pace, and F. Visini. 2011. 'Fault-Based Earthquake Rupture Forecast in Central Italy: Remarks after the L'Aquila M-w 6.3 Event', Bulletin of the Seismological Society of America, 101: 404-12.
[81] Pizzi, A., F. Calamita, M. Coltorti and P. Pieruccini. 2002. Quaternary normal faults, intramontane basins and seismicity in the Umbria-Marche Abruzzi Appenine ridge (Italy): contribution of neotectonic analysis to seismic hazard assessment. Bollettino della società geologica italiana, 1: 923-929.
[82] Porfido, S., E. Esposito, E. Vittori, G. Tranfaglia, A. M. Michetti, M. Blumetti, L. Ferreli, L. Guerrieri, and L. Serva. 2002. 'Areal distribution of ground effects induced by strong earthquakes in the Southern Apennines (Italy)', Surveys in Geophysics, 23: 529-62.
[83] Presti, D., A. Billi, B. Orecchio, C. Totaro, C. Faccenna, and G. Neri. 2013. 'Earthquake focal mechanisms, seismogenic stress, and seismotectonics of the Calabrian Arc, Italy', Tectonophysics, 602: 153-75.
[84] Roberts, G. P., and A. M. Michetti. 2004. 'Spatial and temporal variations in growth rates along active normal fault systems: an example from The Lazio-Abruzzo Apennines, central Italy', Journal of Structural Geology, 26: 339-76.
[85] Roberts, G. P., B. Raithatha, G. Sileo, A. Pizzi, S. Pucci, J. F. Walker, M. Wilkinson, K. McCaffrey, R. J. Phillips, A. M. Michetti, L. Guerrieri, A. M. Blumetti, E. Vittori, P. Cowie, P. Sammonds, P. Galli, P. Boncio, C. Bristow, and R. Walters. 2010. 'Shallow subsurface structure of the 2009 April 6 M-w 6.3 L'Aquila earthquake surface rupture at Paganica, investigated with ground-penetrat…
[86] Sani, F., M. Bonini, L. Piccardi, G. Vannucci, D. Donne, M. Benvenuti, G. Moratti, G. Corti, D. Montanari, L. Sedda, and C. Tanini. 2009. 'Late Pliocene-Quaternary evolution of outermost hinterland basins of the Northern Apennines (Italy), and their relevance to active tectonics', Tectonophysics, 476: 336-56.
[87] Schlagenhauf, A., I. Manighetti, L. Benedetti, Y. Gaudemer, R. Finkel, J. Malavieille, and K. Pou. 2011. 'Earthquake supercycles in Central Italy, inferred from Cl-36 exposure dating', Earth and Planetary Science Letters, 307: 487-500.
[88] Serva, L., E. Esposito, L. Guerrieri, S. Porfido, E. Vittori, and V. Comerci. 2007. 'Environmental effects from five historical earthquakes in southern Apennines (Italy) and macroseismic intensity assessment: Contribution to INQUA EEE scale project', Quaternary International, 173: 30-44.
[89] Tondi, E., L. Piccardi, S. Cacon, B. Kontny, and G. Cello. 2005. 'Structural and time constraints for dextral shear along the seismogenic Mattinata Fault (Gargano, southern Italy)', Journal of Geodynamics, 40: 134-52.
[90] Tortorici, L., C. Monaco, C. Tansi, and O. Cocina. 1995. 'Recent and Active Tectonics in the Calabrian Arc (Southern Italy)', Tectonophysics, 243: 37-55.
[91] Valensise, G., and D. Pantosti. 2001. 'The investigation of potential earthquake sources in peninsular Italy: A review', Journal of Seismology, 5: 287-306.
[92] Valensise, G., D. Pantosti, and R. Basili. 2004. 'Seismology and Tectonic Setting of the 2002 Molise, Italy, Earthquake', Earthquake Spectra, 20: S23-S37.
[93] Westaway, R., R. Gawthorpe, and M. Tozzi. 1989. 'Seismological and Field Observations of the 1984 Lazio-Abruzzo Earthquakes - Implications for the Active Tectonics of Italy', Geophysical Journal International, 98: 489-514.
